# Supplementary material
Source: HighWire-hosted journal article supplement (https://erj.ersjournals.com/content/57/2/2003064)
Supplement: inline-supplementary-material-1 [file inline-supplementary-material-1.pdf]

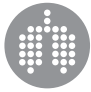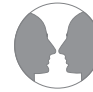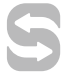

SHAREABLE PDF

# Budesonide–formoterol reliever therapy in intermittent *versus* mild persistent asthma

Alberto Papi <sup>1</sup>, Irene Braithwaite <sup>2</sup>, Stefan Ebmeier <sup>2</sup>, Robert J. Hancox <sup>3,4</sup>, Tim Harrison<sup>5</sup>, Mark Holliday<sup>2</sup>, Claire Houghton<sup>2</sup>, Luca Morandi<sup>1</sup>, Karen Oldfield<sup>2</sup>, Ian D. Pavord<sup>6</sup>, Helen K. Reddel <sup>7</sup>, Mathew Williams <sup>2</sup>, Mark Weatherall<sup>8</sup> and Richard Beasley <sup>2,9</sup> on behalf of the NovelSTART Study Team

**Affiliations:** <sup>1</sup>Respiratory Medicine Unit, Dept of Morphology, Surgery and Experimental Medicine, Università di Ferrara, Ferrara, Italy. <sup>2</sup>Medical Research Institute of New Zealand, Wellington, New Zealand. <sup>3</sup>Dept of Respiratory Medicine, Waikato Hospital, Hamilton, New Zealand. <sup>4</sup>Dept of Preventive and Social Medicine, University of Otago, Dunedin, New Zealand. <sup>5</sup>Nottingham NIHR Biomedical Research Centre, University of Nottingham, Nottingham, UK. <sup>6</sup>Oxford Respiratory NIHR BRC, Nuffield Dept of Medicine, University of Oxford, Oxford, UK. <sup>7</sup>Woolcock Institute of Medical Research, University of Sydney, Sydney, Australia. <sup>8</sup>University of Otago Wellington, Wellington, New Zealand. <sup>9</sup>Capital and Coast District Health Board, Wellington, New Zealand.

**Correspondence:** Alberto Papi, Respiratory Medicine Unit, Dept of MSEM, Morphology, Surgery and Experimental Medicine, University of Ferrara, Via Aldo Moro 8, 44124 Ferrara, Italy. E-mail ppa@unife.it

@ERSpublications

**These *post hoc* analyses of NovelSTART provide the first evidence that the exacerbation risk reduction with budesonide–formoterol reliever therapy *versus* salbutamol reliever therapy is similar in adults with intermittent and mild persistent asthma** <https://bit.ly/3iiRKqR>

**Cite this article as:** Papi A, Braithwaite I, Ebmeier S, *et al.* Budesonide–formoterol reliever therapy in intermittent *versus* mild persistent asthma. *Eur Respir J* 2021; 57: 2003064 [<https://doi.org/10.1183/13993003.03064-2020>].

This single-page version can be shared freely online.

## To the Editor:

Traditional asthma maintenance therapy in adults and adolescents comprises inhaled corticosteroids (ICS), with a long-acting  $\beta_2$ -agonist (LABA) added if ICS monotherapy provides insufficient control [1, 2]. For patients with symptoms occurring on two or fewer occasions per week (so-called “intermittent” asthma [2]), who may represent around one-third of the asthma population [3], many guidelines still recommend short-acting  $\beta_2$ -agonist (SABA) rescue medication alone [2, 4]. However, SABA-only treatment is still associated with severe exacerbations [5], the incidence of which is almost halved with low-dose maintenance ICS in intermittent asthma [6], but adherence is poor [7, 8]. Since 2019, the Global Initiative for Asthma (GINA) strategy document has advised against SABA monotherapy, even in those with symptoms occurring on fewer than two occasions per month [9, 10]. Instead, ICS therapy is now recommended whenever rescue medication is taken, either as combined ICS–formoterol, or a separate ICS inhaler [9]. However, evidence supporting this in patients with symptoms occurring on two or fewer occasions per week is limited.
